# Supplementary material
Source: Springer Nature journal article supplement (https://www.springermedizin.de/resource/supplementary/12936_2003_70_MOESM1_ESM.pdf/9546874)

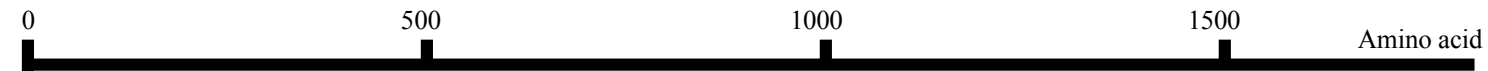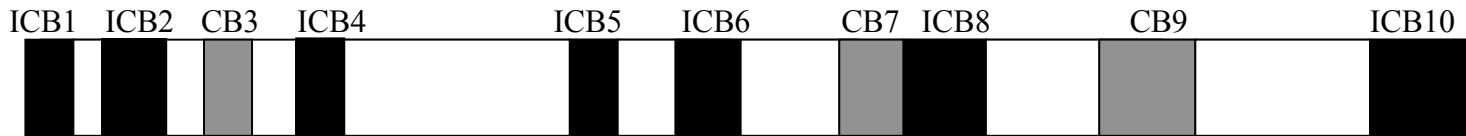

Pv1, 2084

Pv2, 2534

Supplement: MOESM1 [file 9546874]
